# Supplementary material for: Theoretical Study on the Photoelectric Properties of a Class of Copolymers Based on Benzodithiophene for Solar Cells
Source: Hindawi journal article supplement (doi:10.1155/2018/3270313), 2018-05-30
Supplement: f1 [file 3270313.f1.doc]

**Supplementary Materials**

**Theoretical Study on the Photoelectric Properties of a Class of Copolymers Based on Benzodithiophene for Solar Cells**

**Xiao-Hua Xie, 1 Xin-Wei Zhao2, and Ming Li* 3**

1 School of Chemistry and Chemical Engineering, Yangtze Normal University, Chongqing 408100, PR China

2 Department of Physics, Tokyo University of Science, 1-3 Kagurazaka, Shinjuku-ku, Tokyo 162-8601, Japan

3 School of Chemistry and Chemical Engineering, Southwest University, Chongqing 400715, PR China

**TABLE 1S: BCP properties, wiberg bond index (WBI), and electronic configurations for bonding orbitals of central bonds.**

| Polymer | Ρ(r) |  | WBI | Hybridization |
| --- | --- | --- | --- | --- |
| PBDTTBT | 0.28 | -0.69 | 1.16 |  |
| PBDTTTP | 0.28 | -0.70 | 1.17 |  |
| PBDTTTO | 0.28 | -0.70 | 1.18 |  |
| PBDTTTPD | 0.28 | -0.71 | 1.18 |  |
| PBDTTFPD | 0.28 | -0.70 | 1.17 |  |

**TABLE 2S:** NICS for polymers at RCPs.

| Polymer | a1 | a2 | a3 | a4 | b | c | d |
| --- | --- | --- | --- | --- | --- | --- | --- |
| PBDTTBT | 3.60 | -7.57 | -9.55 | -3.46 | 0.98 | -3.18 | -14.71 |
| PBDTTTP | 7.28 | -8.09 | -8.19 | -1.68 | 2.69 | -2.09 | -15.11 |
| PBDTTTO | 6.10 | -6.95 | -8.37 | -1.87 | 3.17 | -2.69 | -14.23 |
| PBDTTTPD | 7.50 | -7.34 | -9.02 | -3.87 | 3.00 | -3.92 | -0.44 |
| PBDTTFPD | 6.67 | -6.54 | -8.89 | -3.21 | 3.32 | -3.54 | -0.22 |

**TABLE 3S:** HOMO and LUMO energy levels, and band gaps from experiment and calculation for PBDTTBT. All energies are in eV.

|  | Exp | B3LYP/6-31G(d) | B3PW91/6-31G(d) | PW91PW91/6-31G(d) | PBEPBE/6-31G(d) | LSDA/6-31G(d) |
| --- | --- | --- | --- | --- | --- | --- |
| H | -5.31 | -5.01 | -5.11 | -4.41 | -4.38 | -4.98 |
| L | -3.44 | -2.68 | -2.76 | -3.28 | -3.24 | -3.92 |
| Eg | 1.87 | 2.33 | 2.35 | 1.13 | 1.14 | 1.05 |


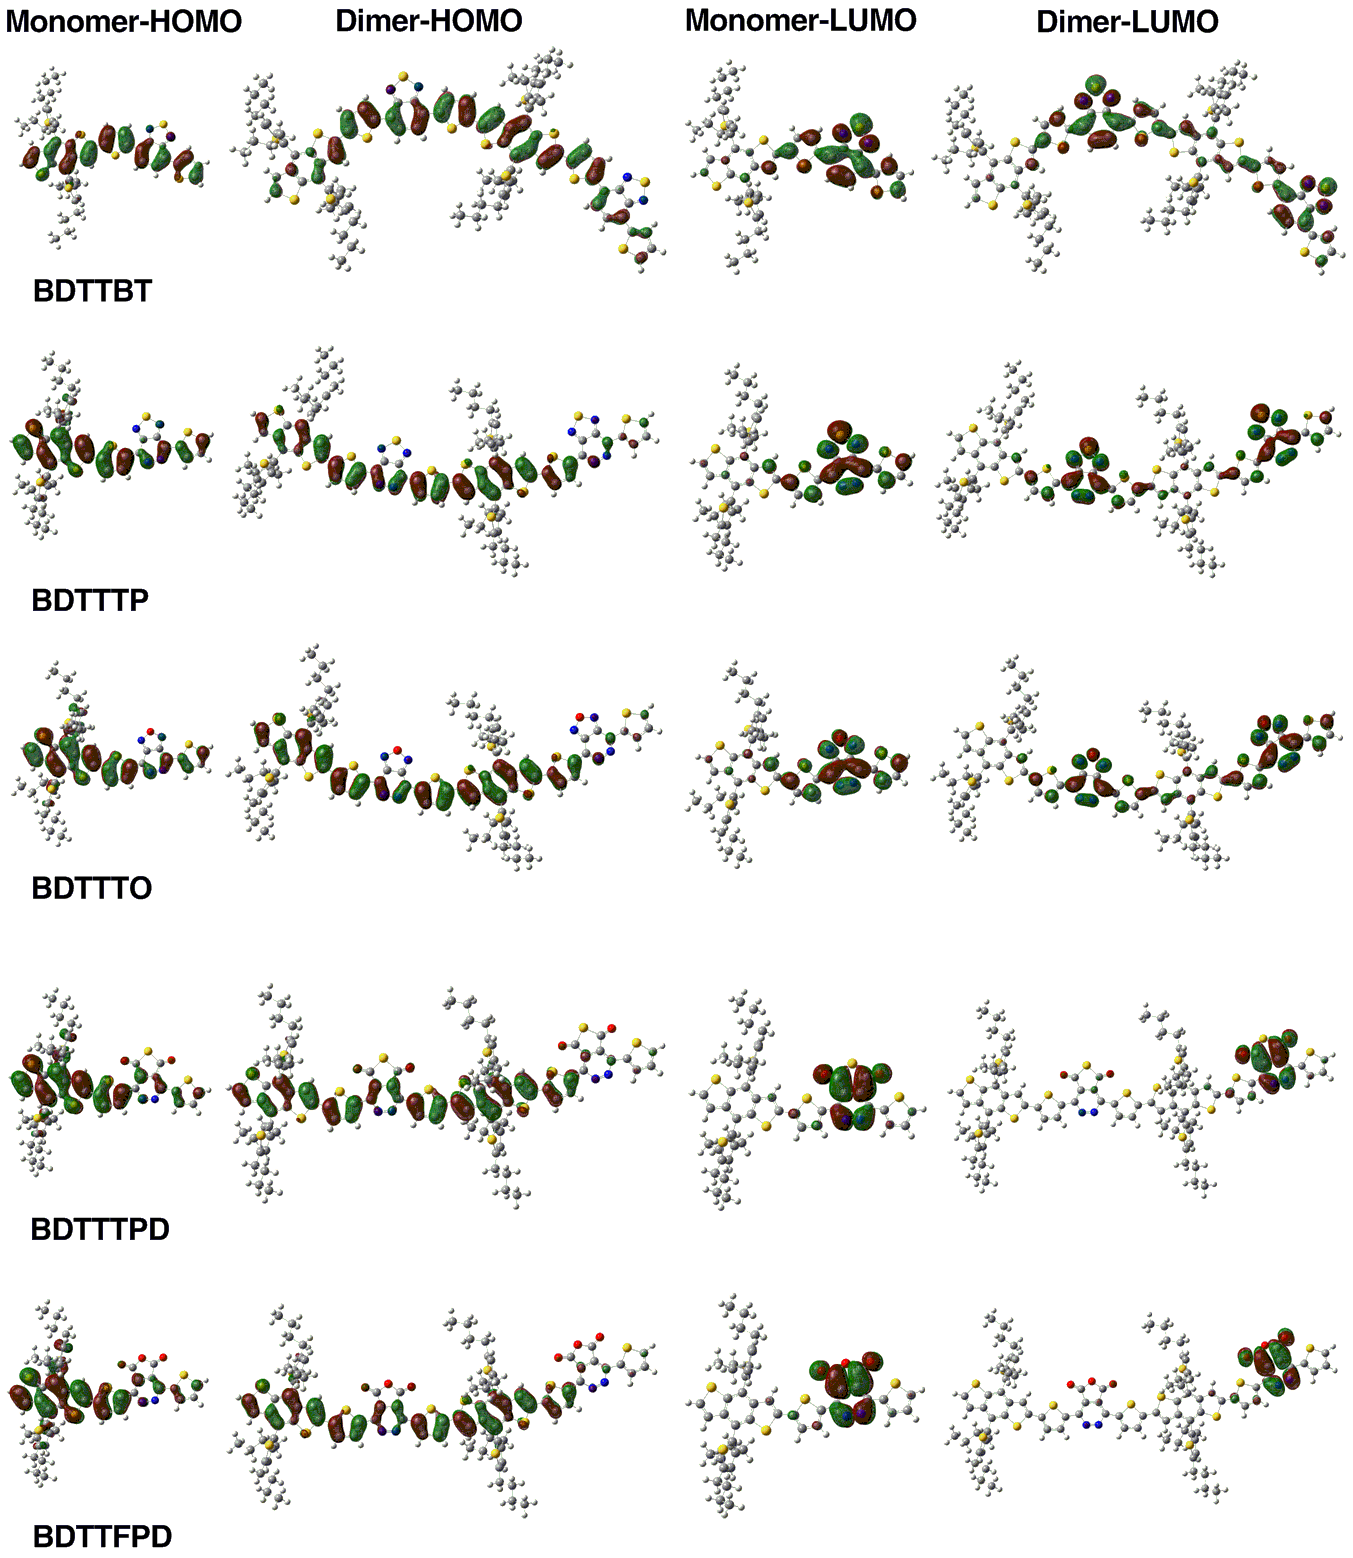


**FIGURE 1S:** HOMO (H) and LUMO (L) diagrams for monomers and dimers.


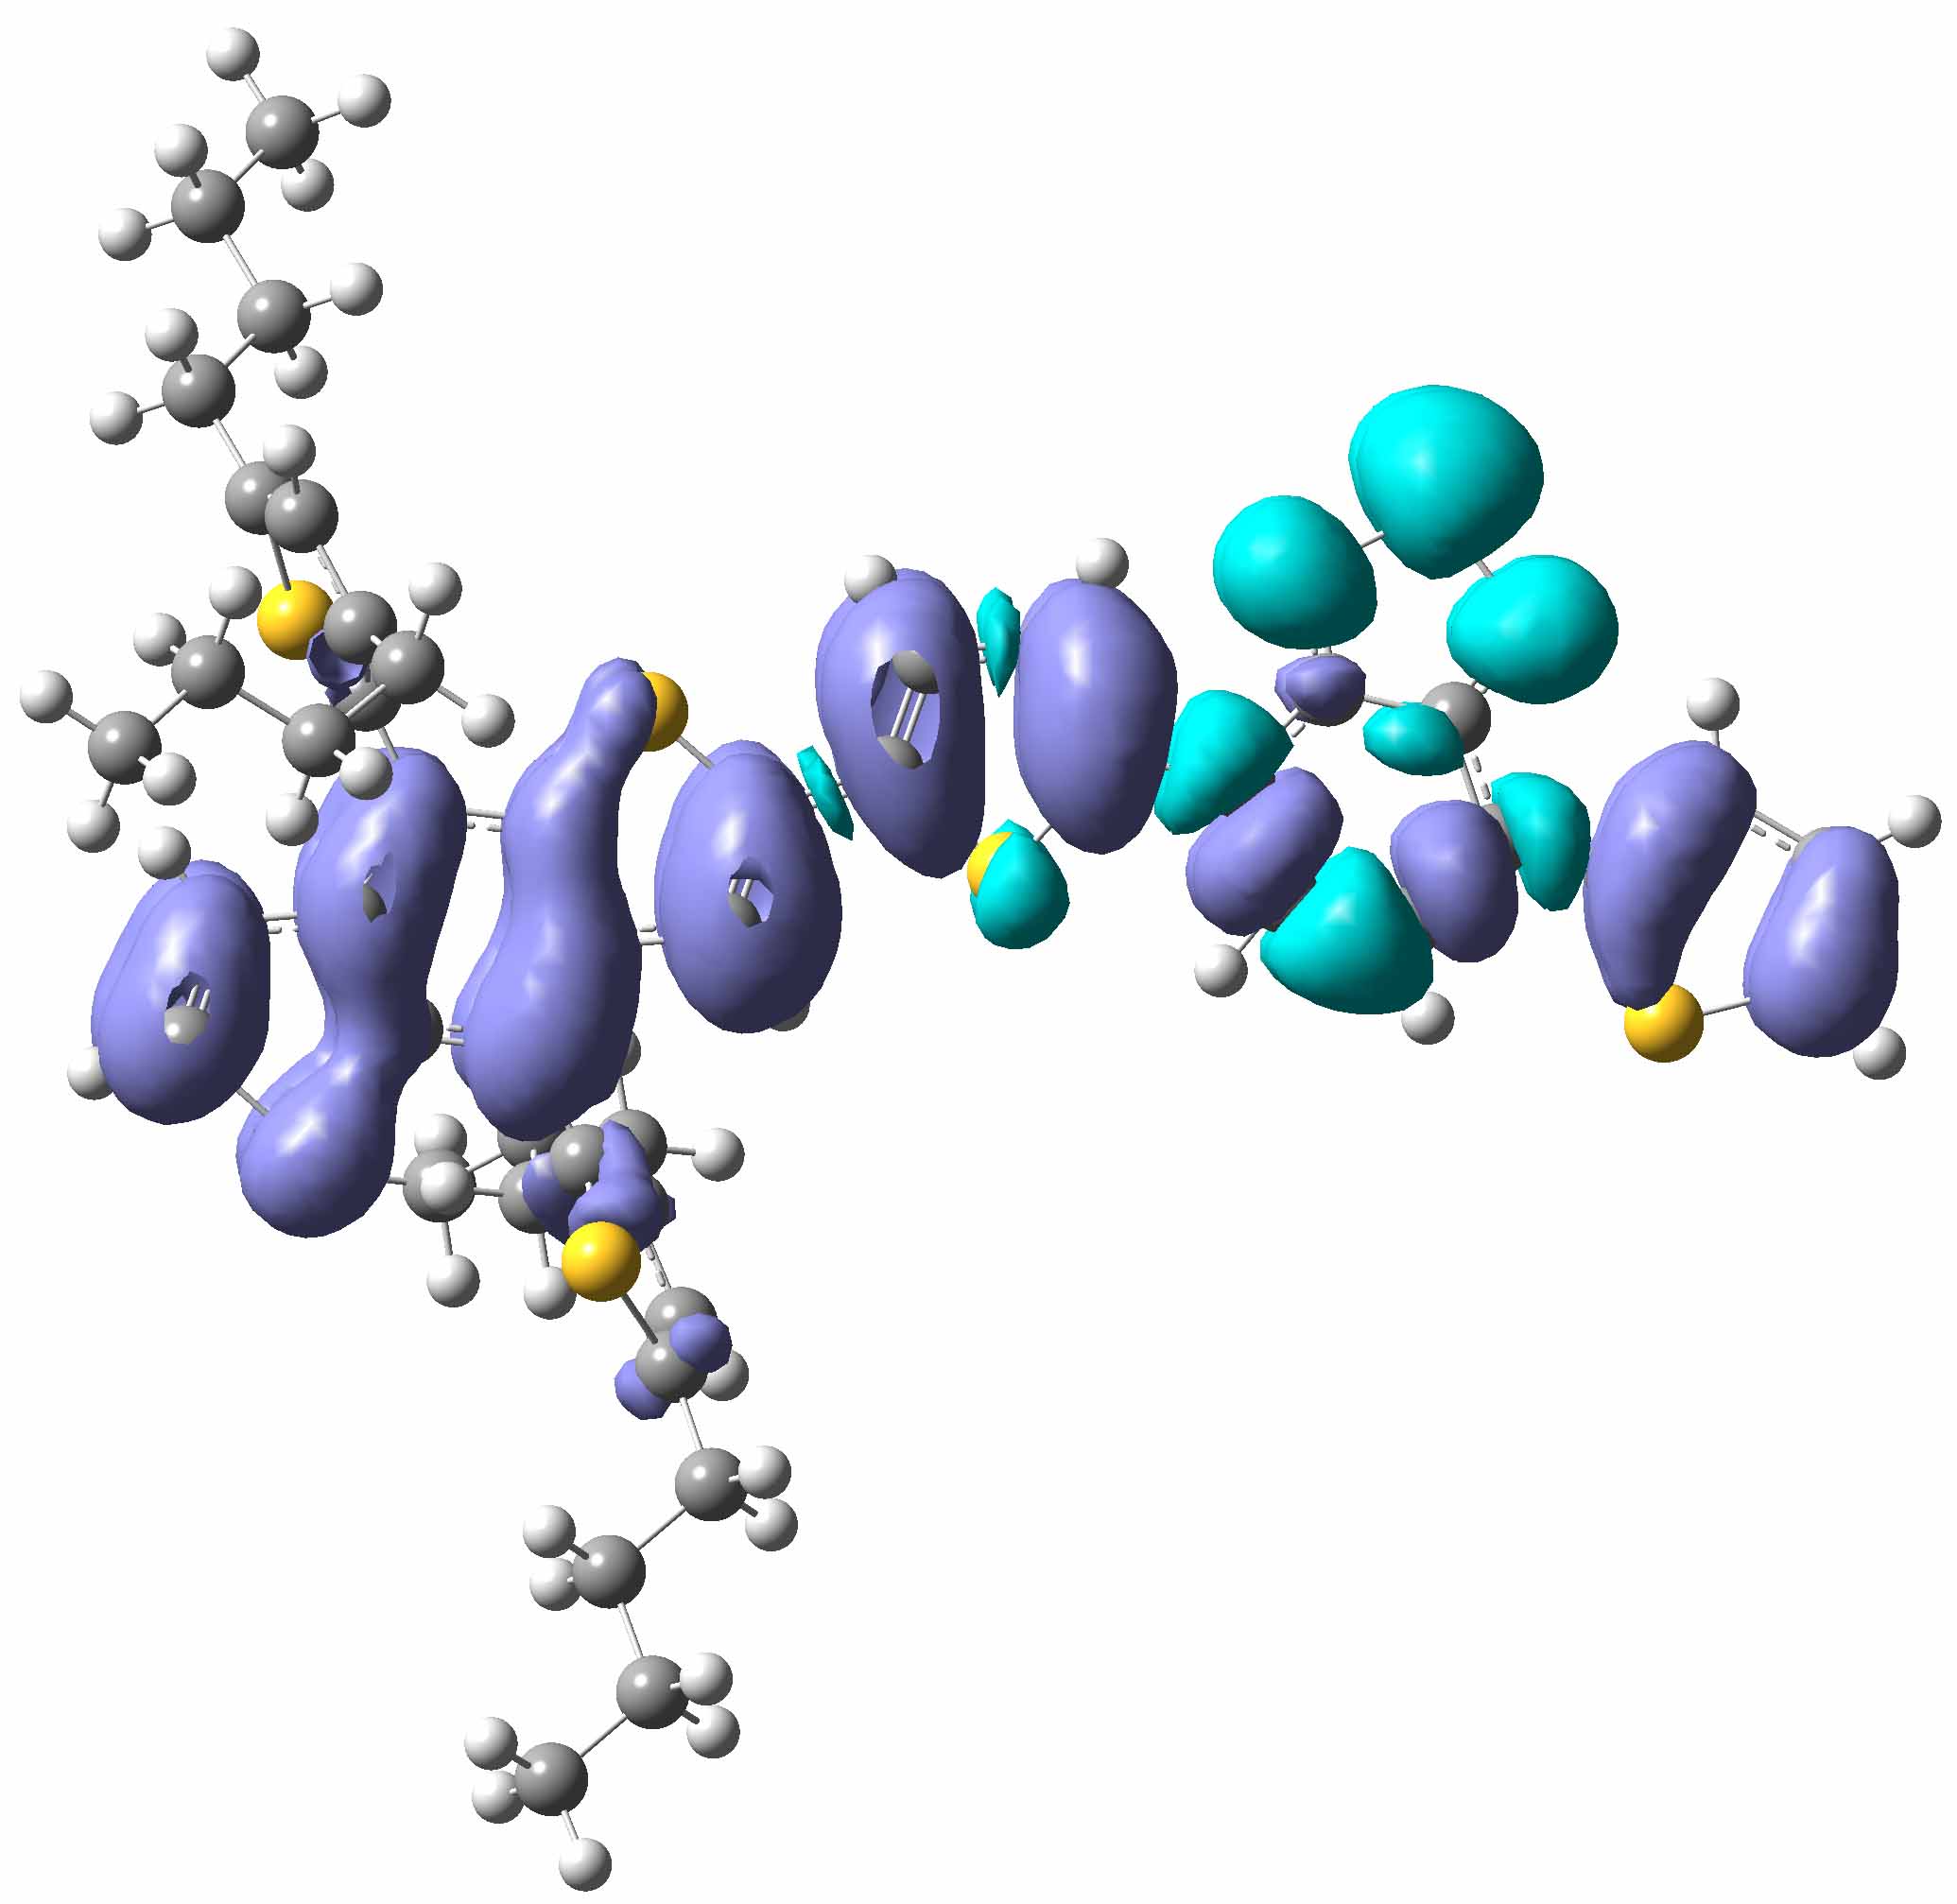

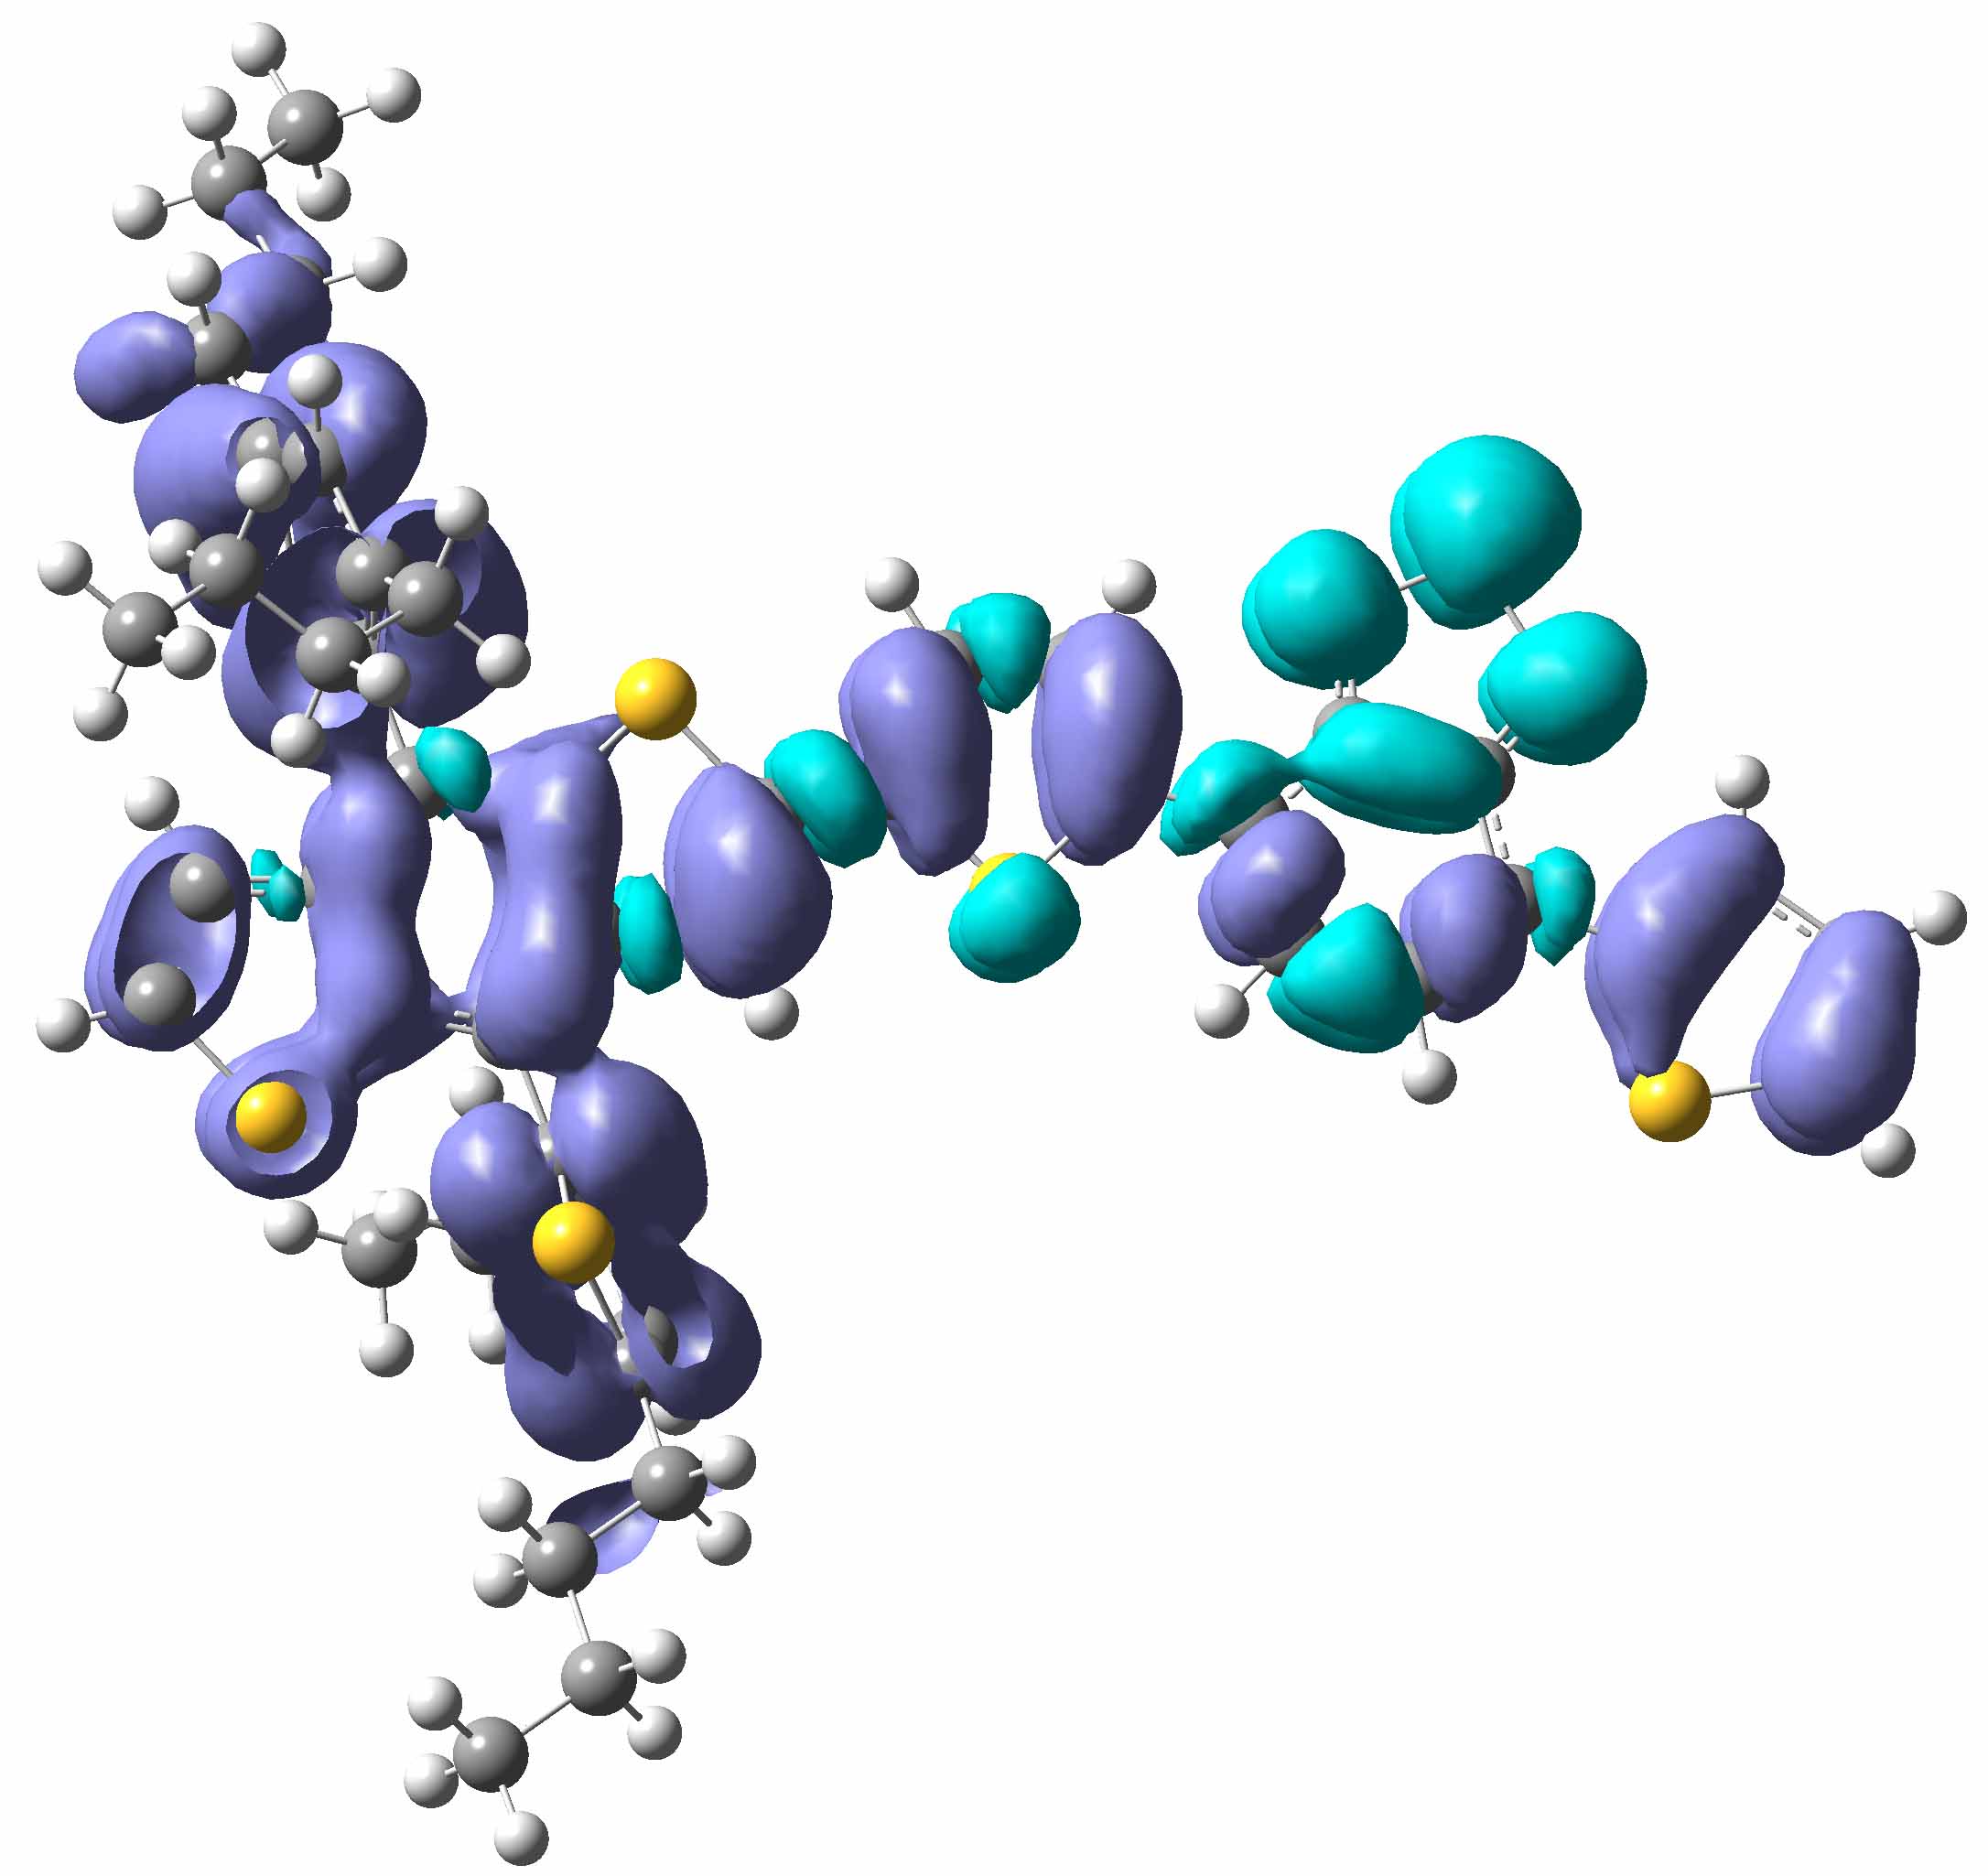

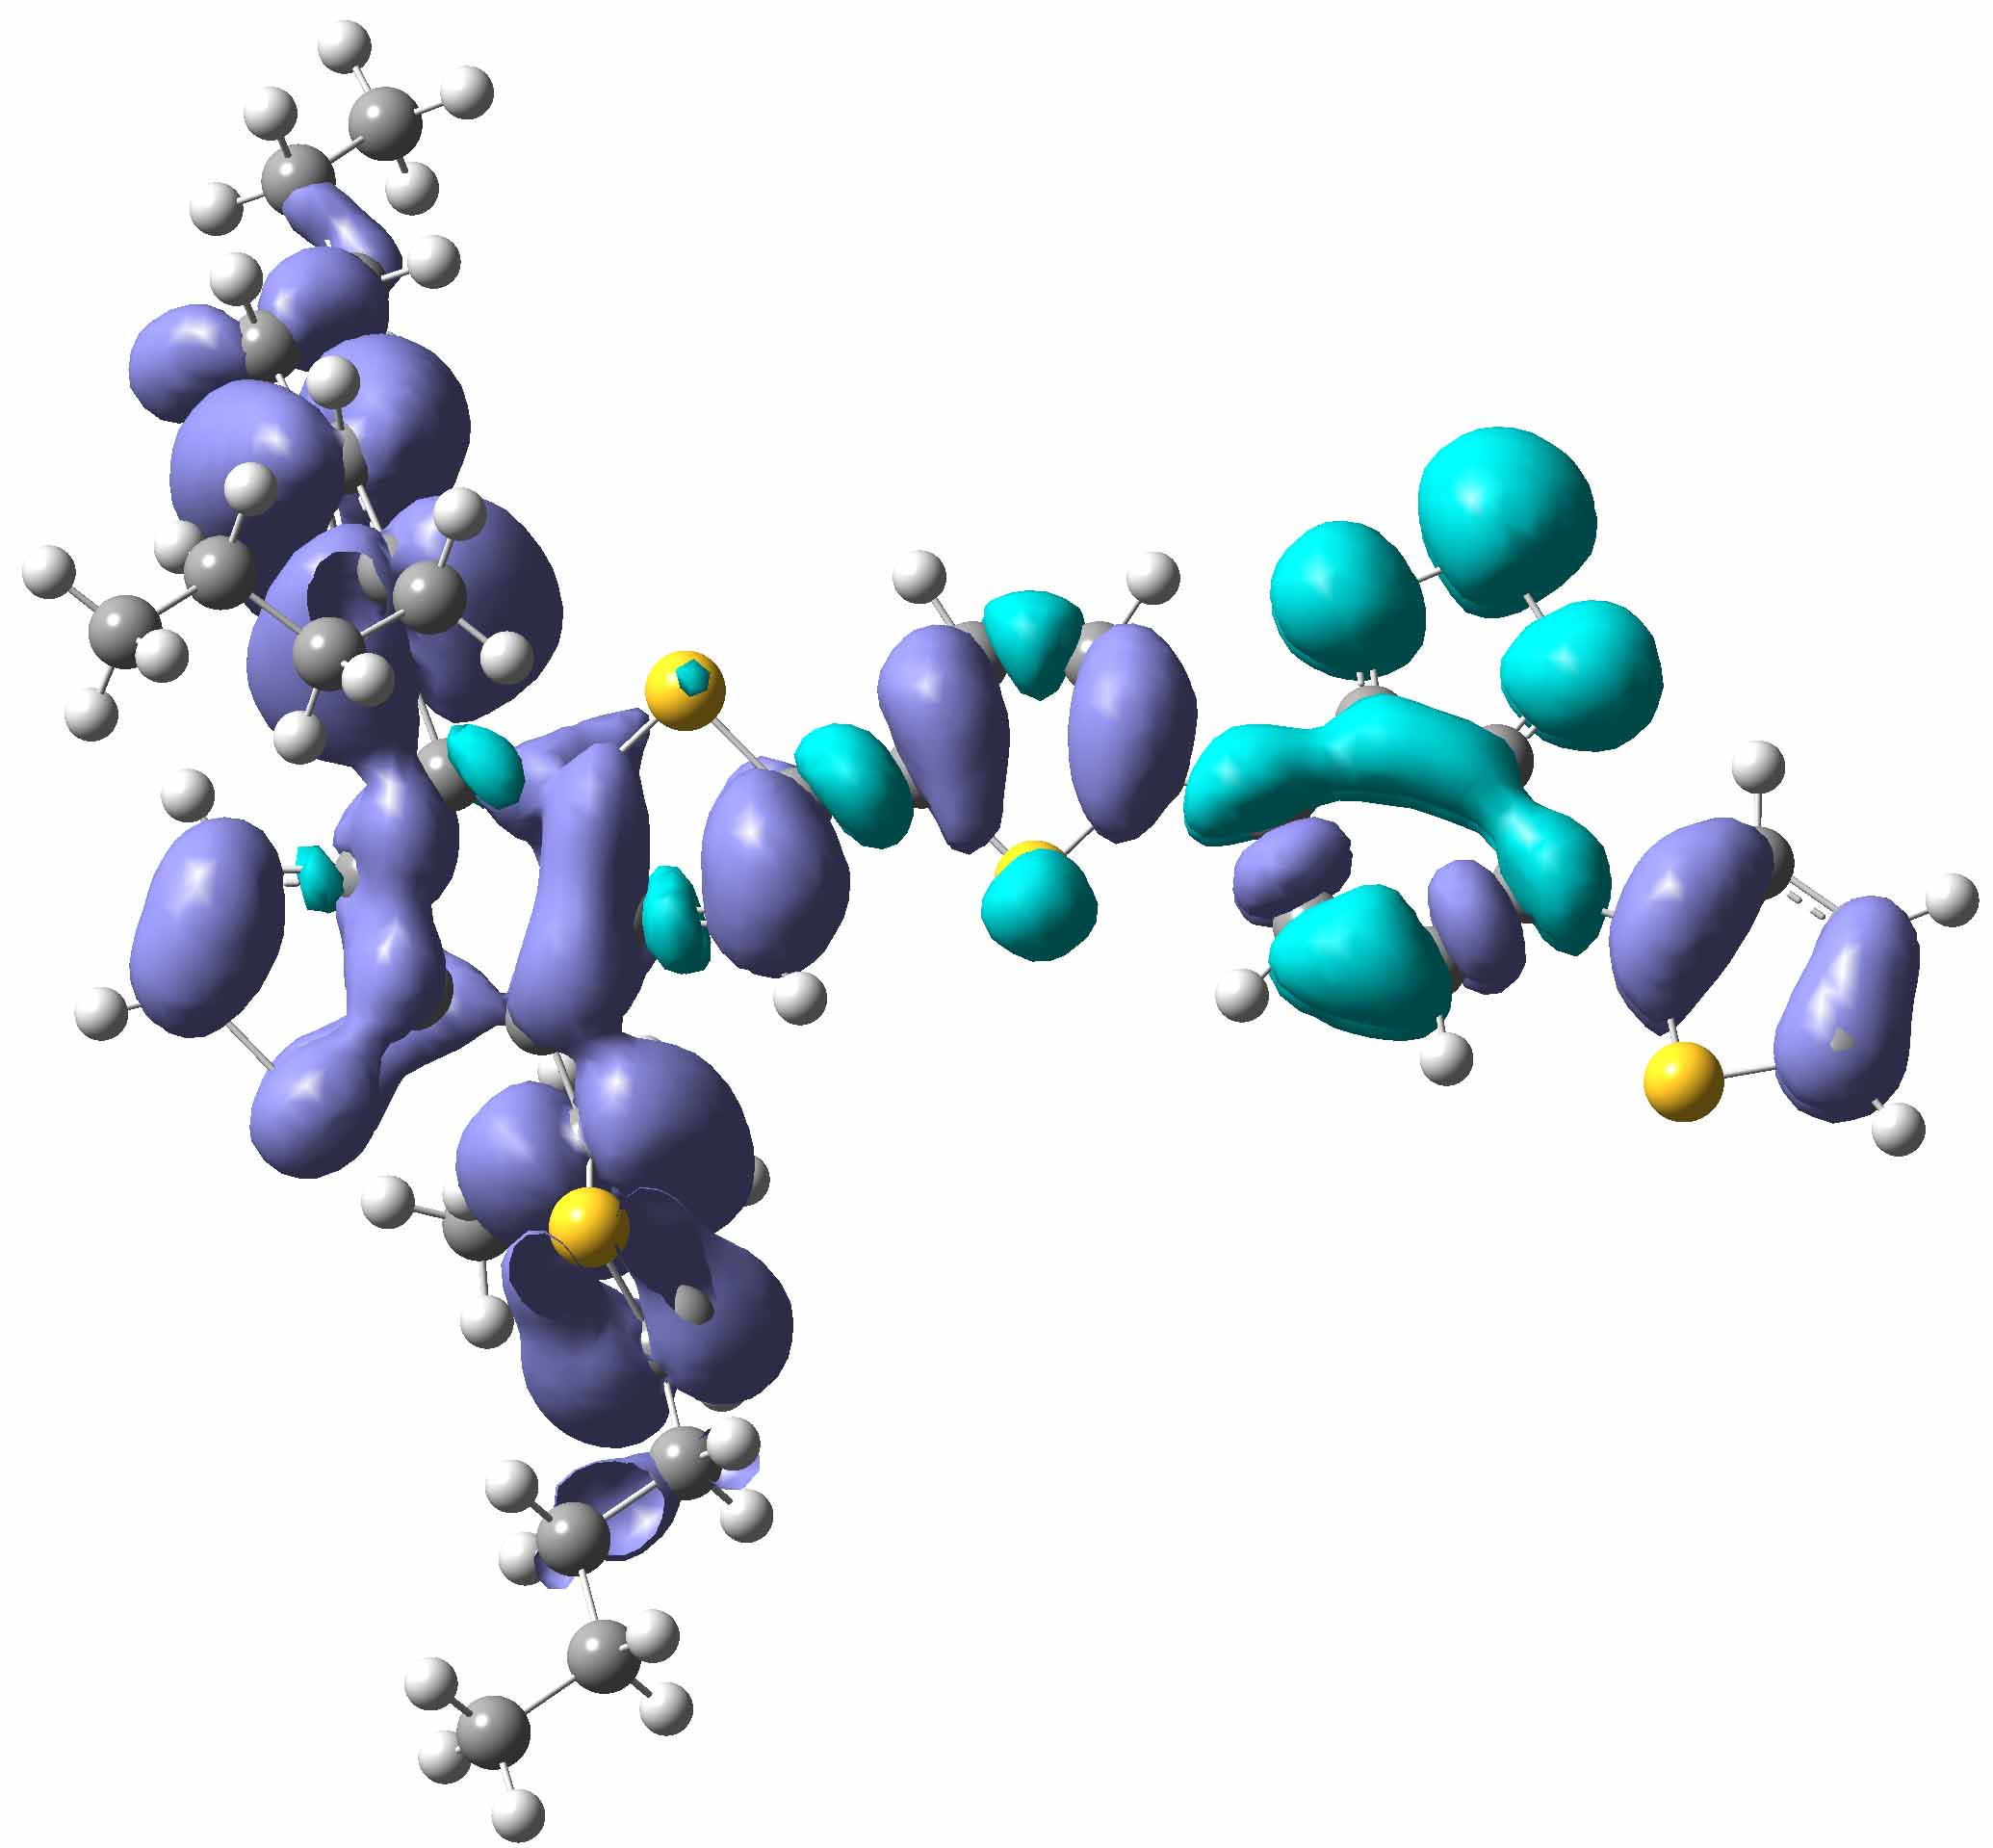

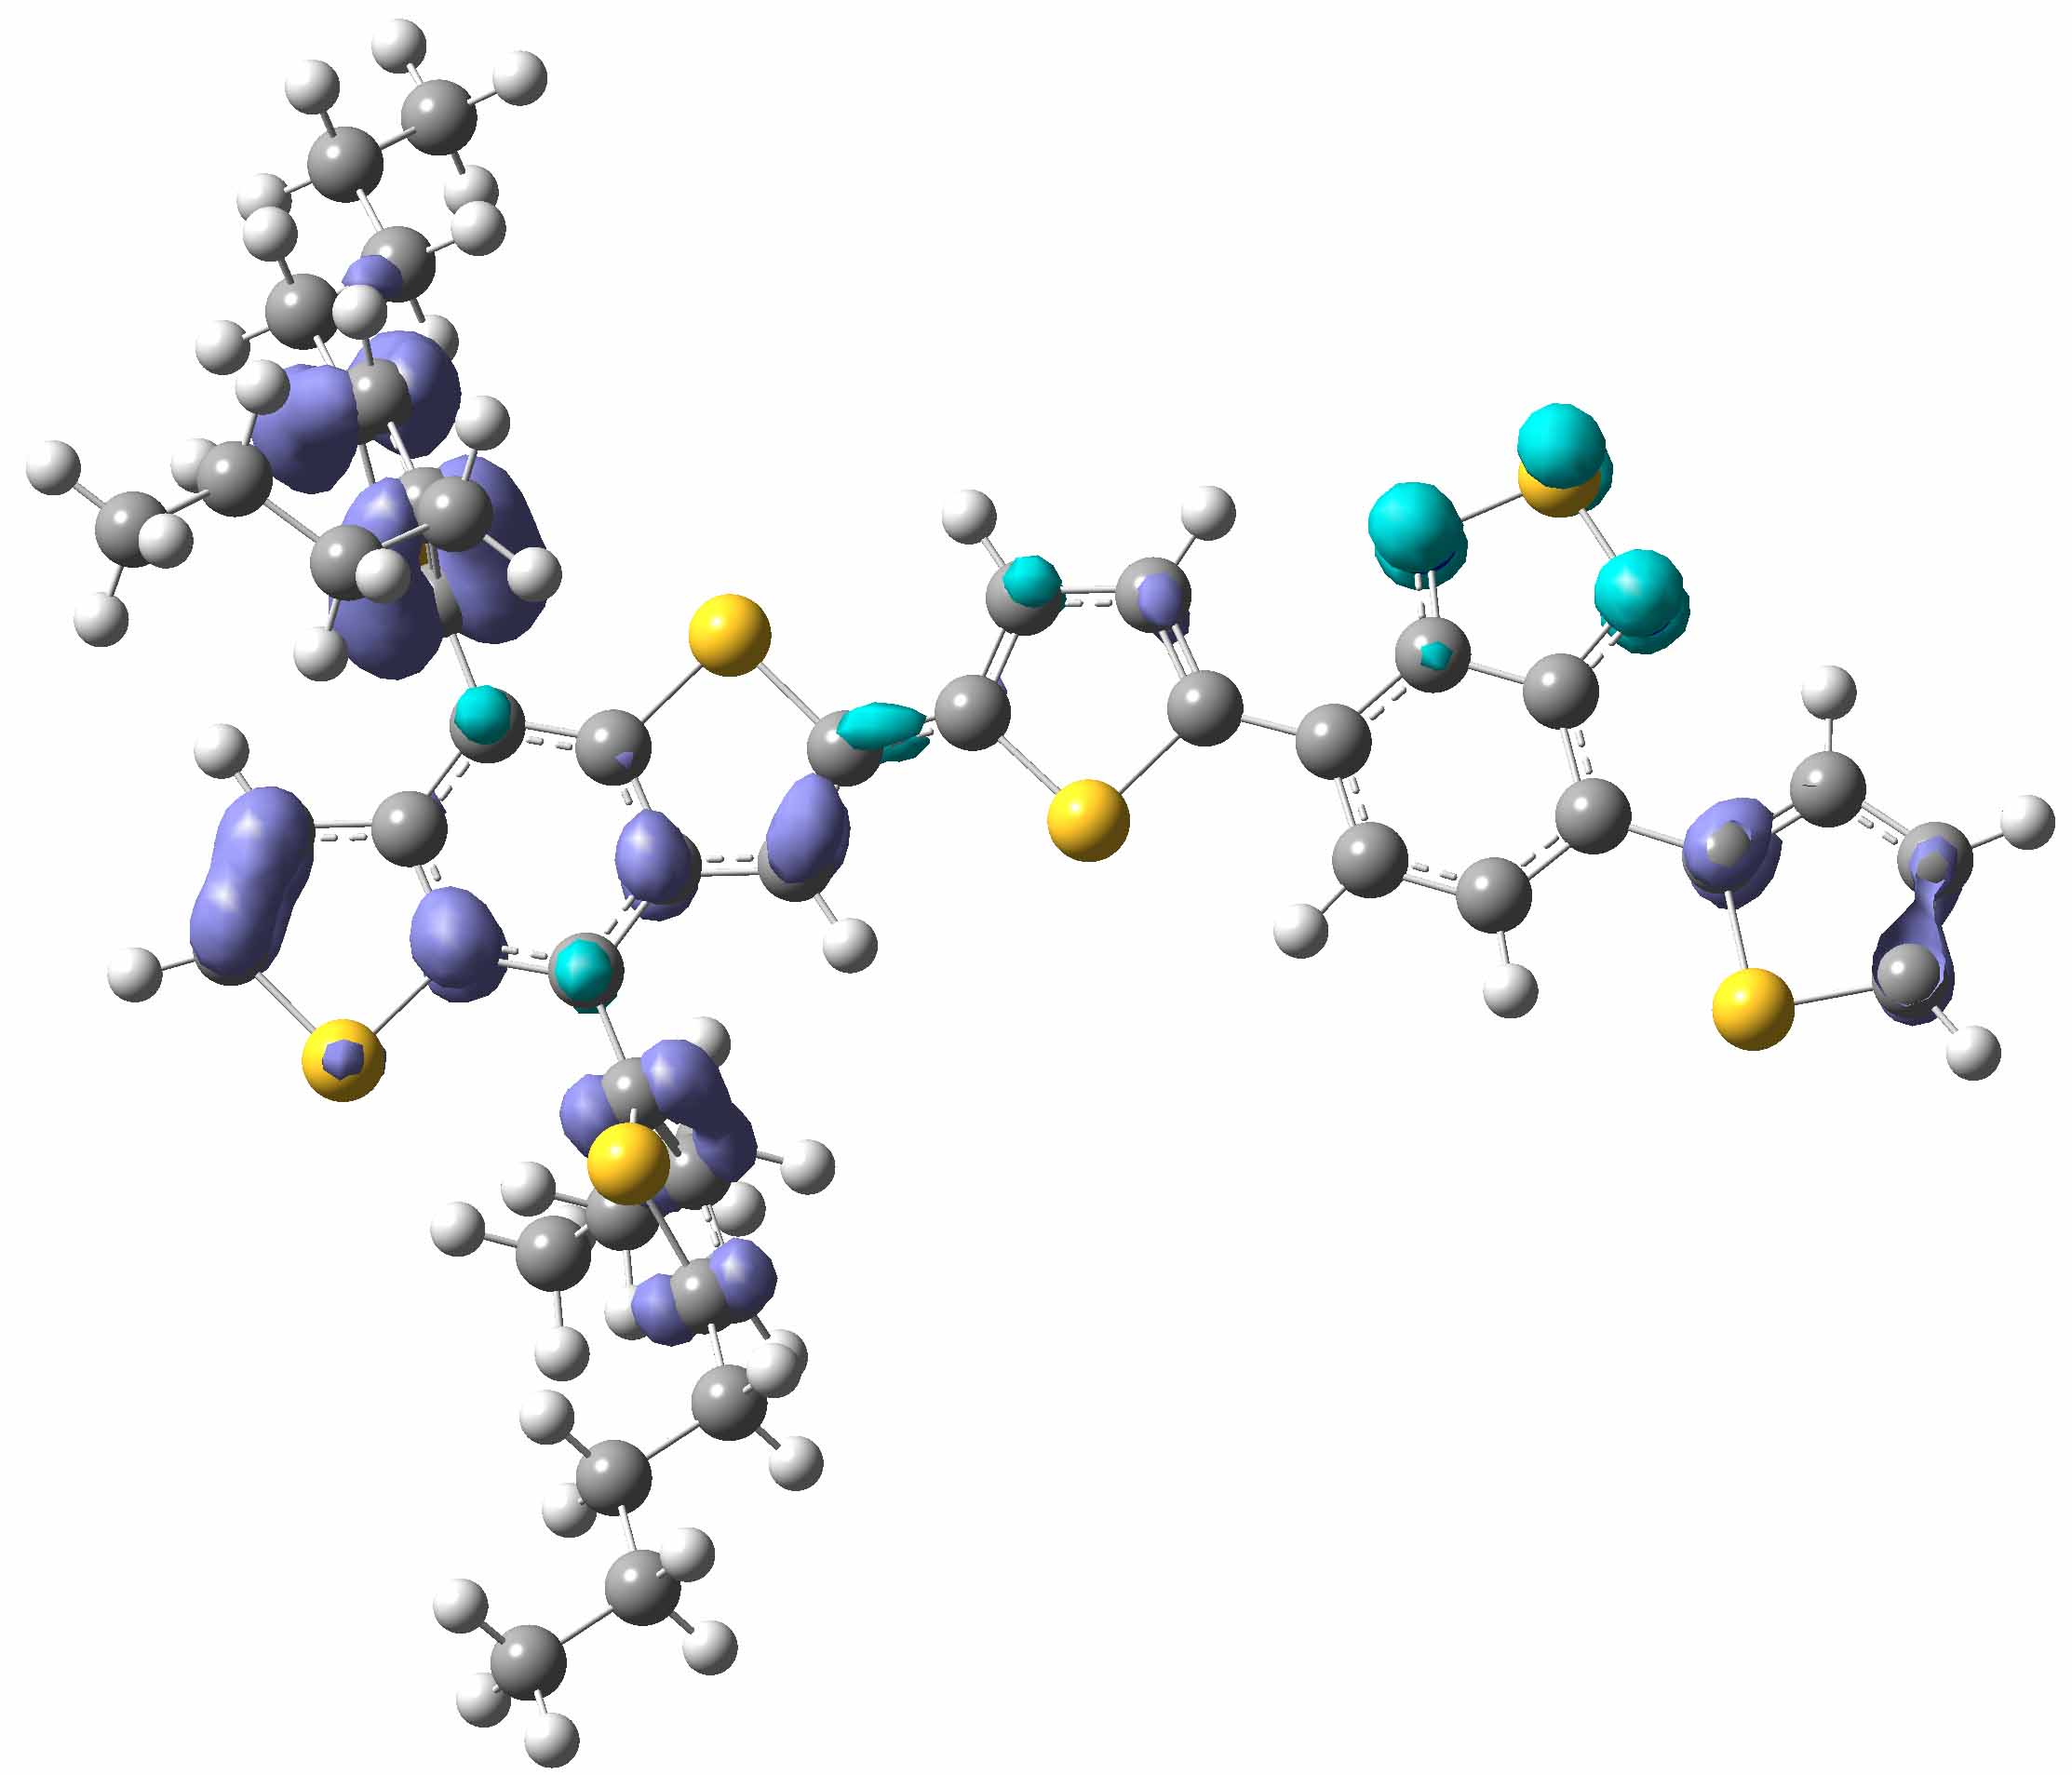


**607 nm (S1) 424 nm (S3) 416 nm (S5) 327 nm (S15)**

**FIGURE 2S:** Charge difference densities of the main electronic excited states of PBDTTBT, where the purple and green colors stand for the hole and electron, respectively.


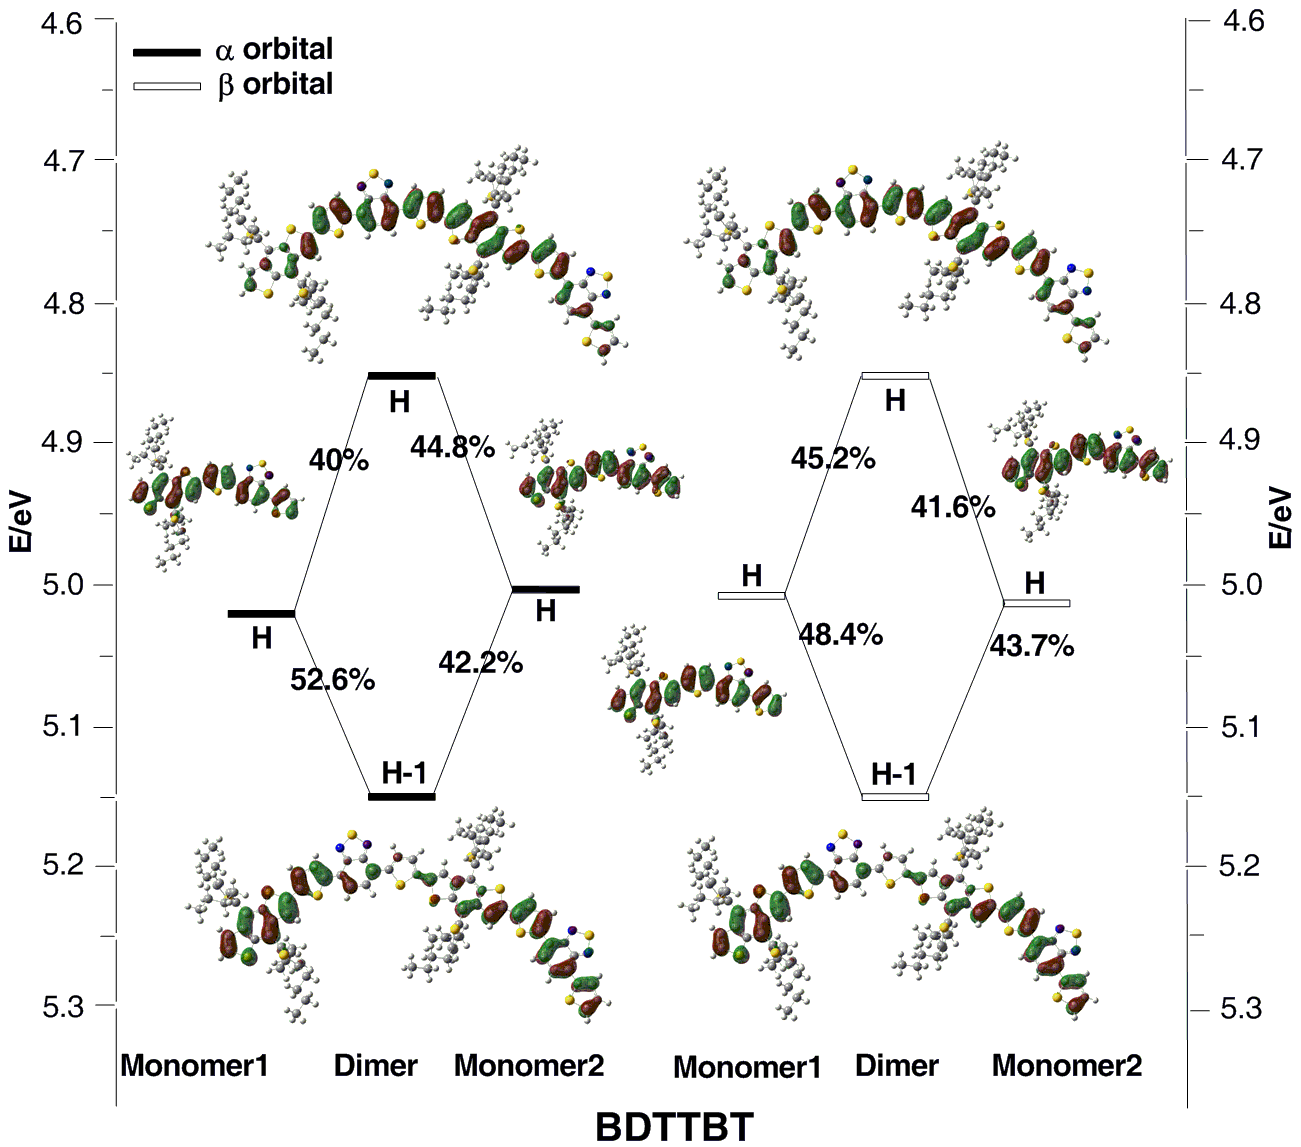

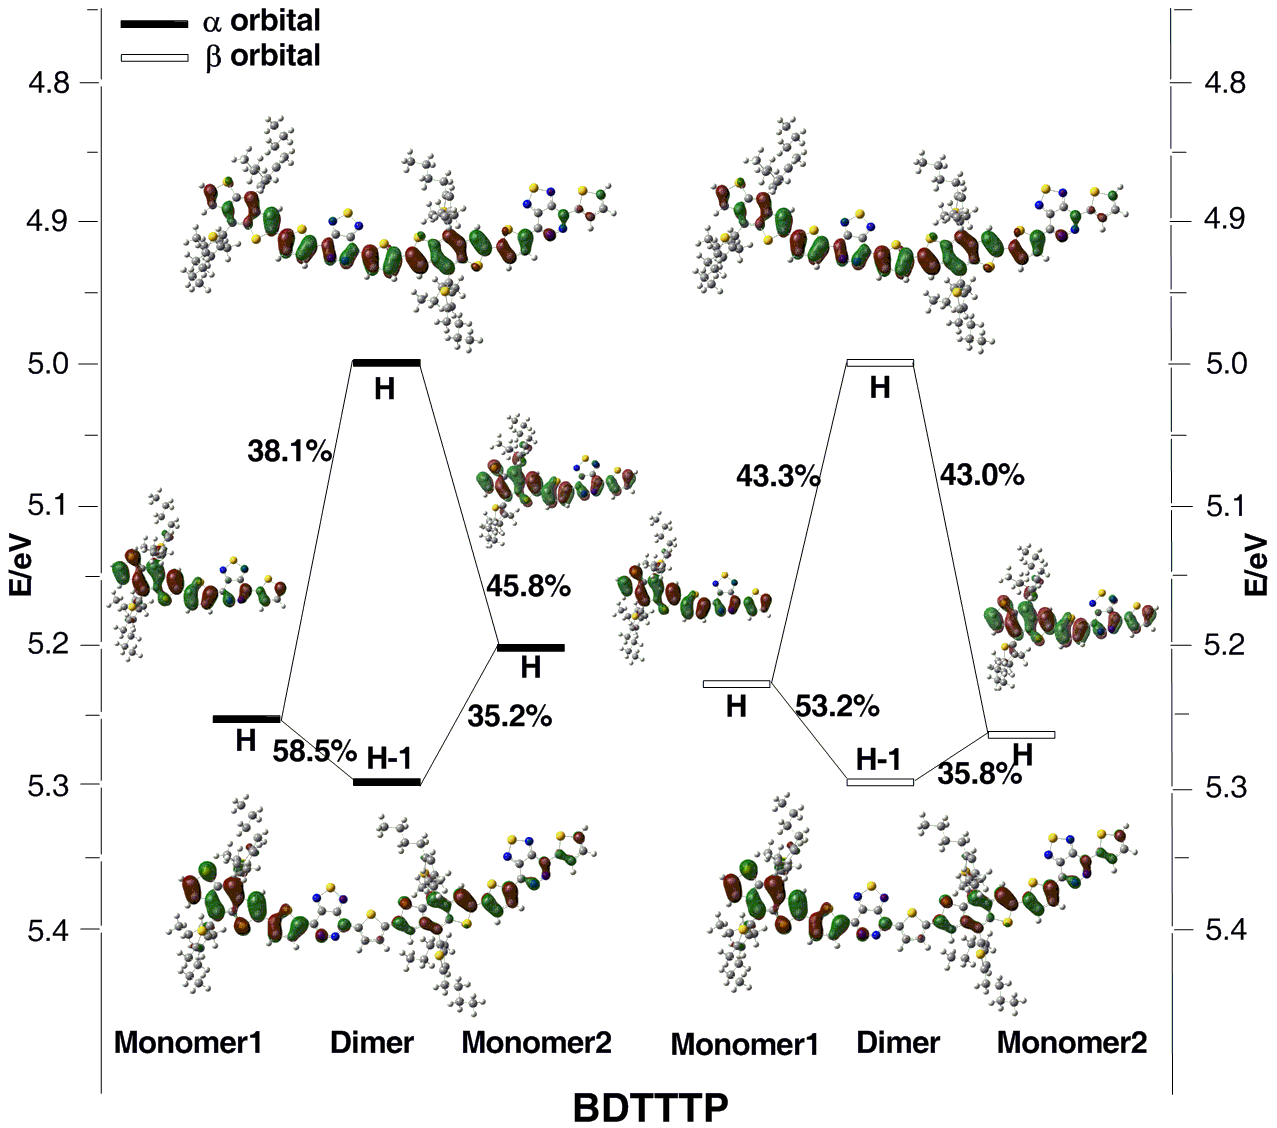


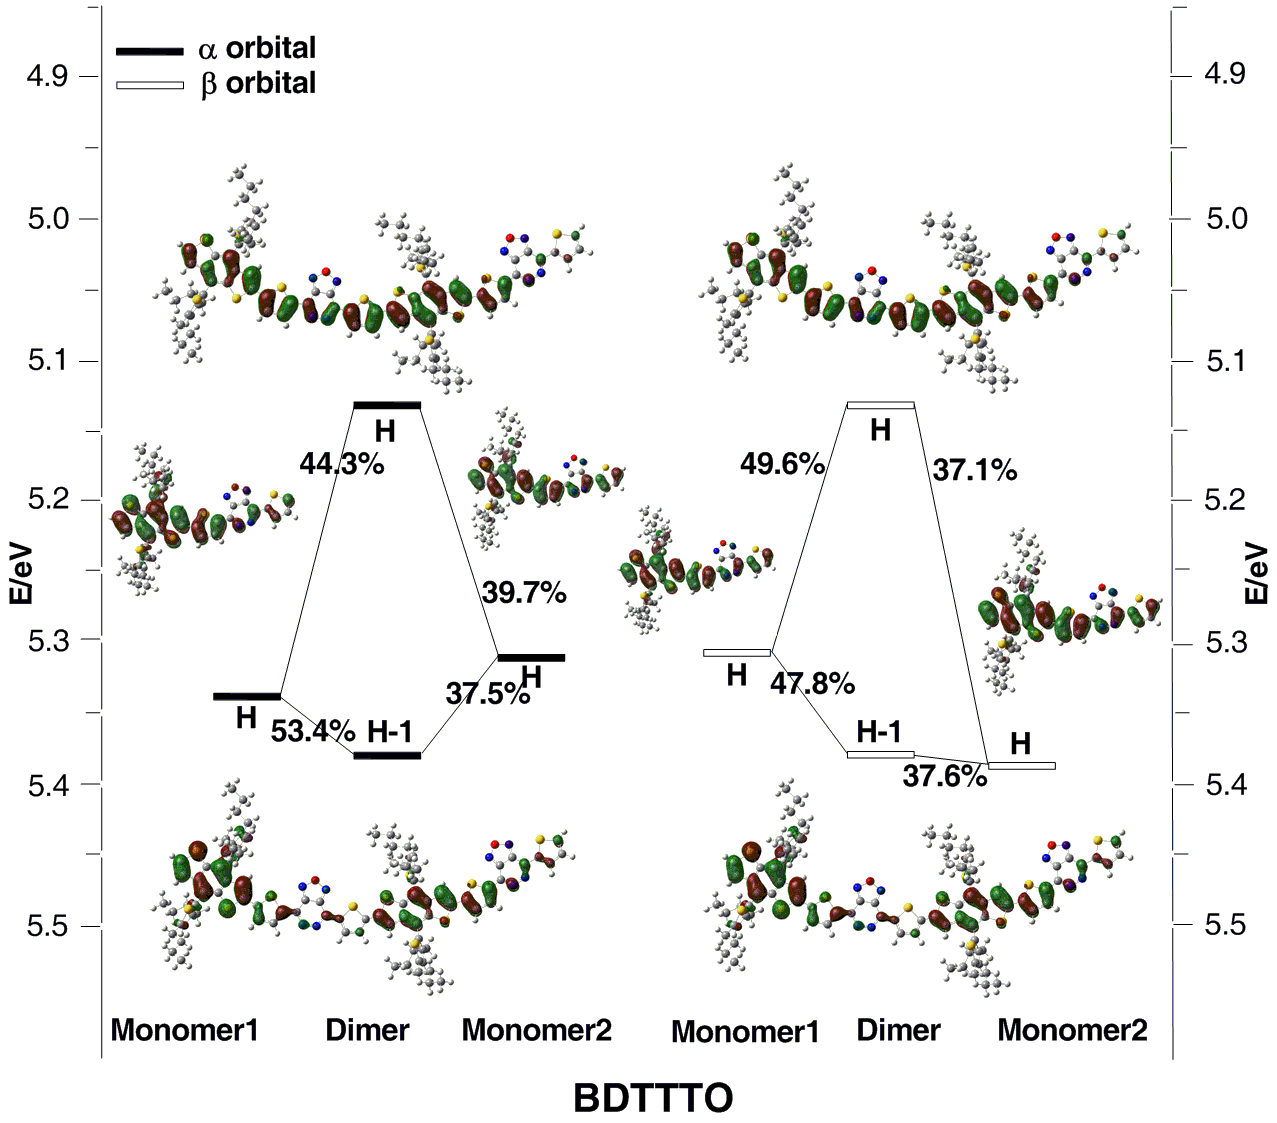

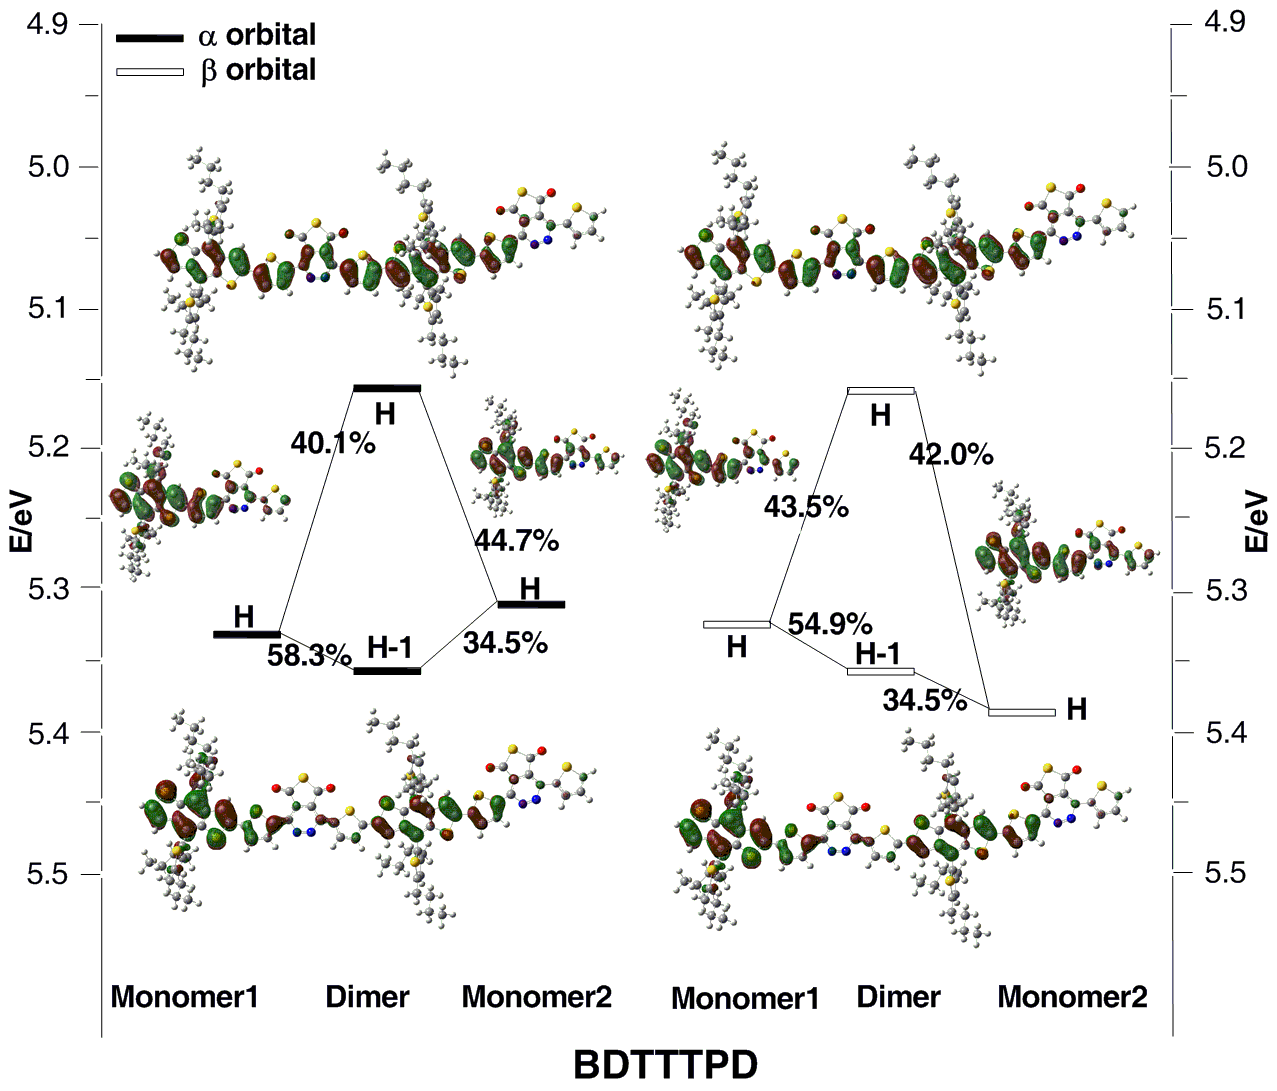


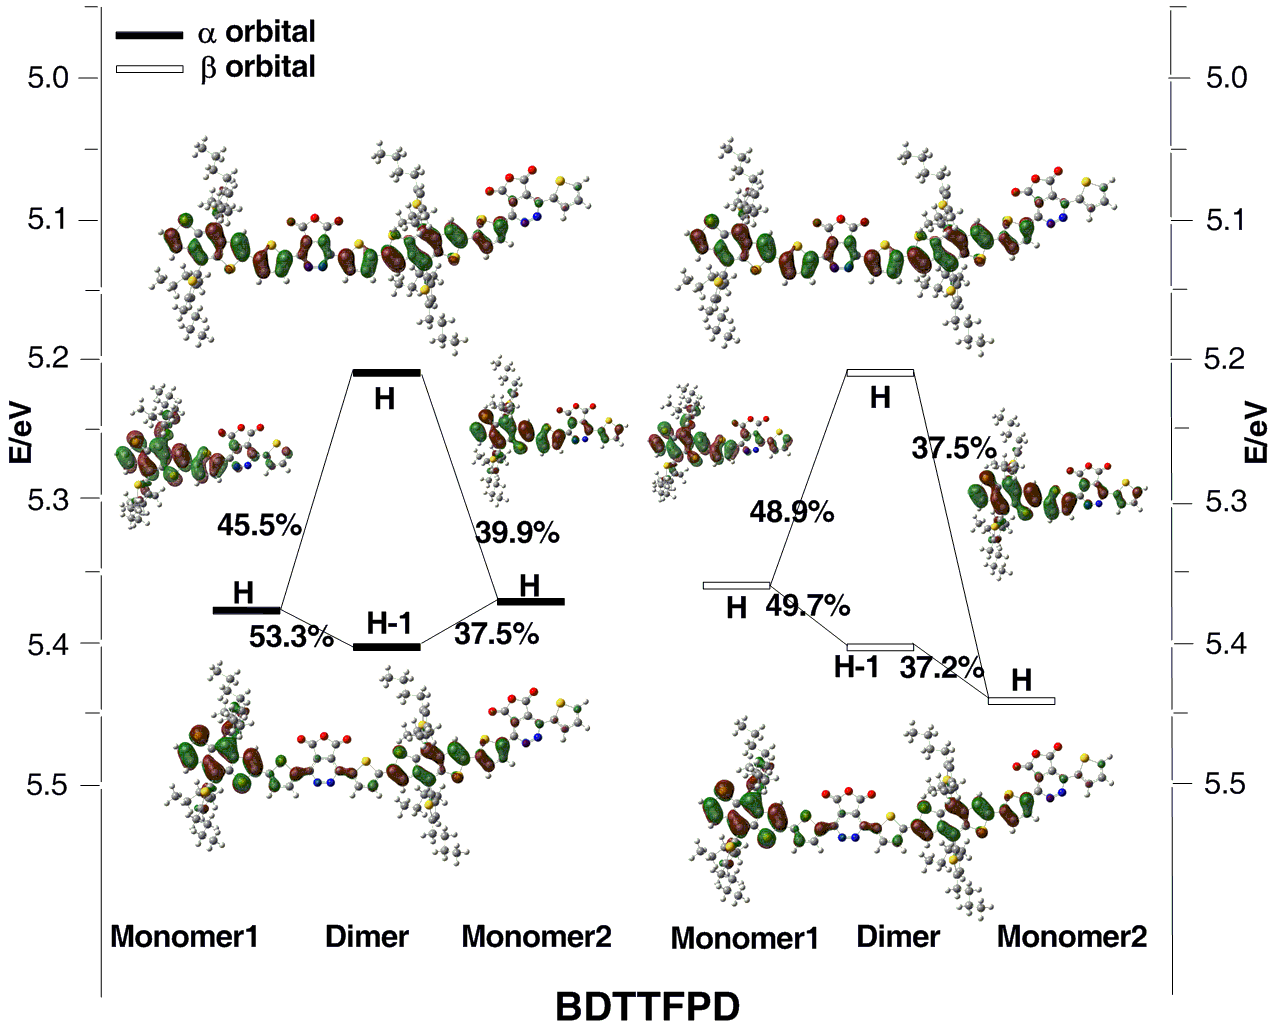


**FIGURE 3S:** Orbital interaction diagrams (B3LYP/6-31G*) for dimers, in which two monomers are interacting fragments,  and  represent different spins.
